# Supplementary material for: Rifabutin Acts in Synergy and Is Bactericidal with Frontline Mycobacterium abscessus Antibiotics Clarithromycin and Tigecycline, Suggesting a Potent Treatment Combination
Source: PubMed Central journal article supplement (PMC6105836; doi:10.1128/aac.00283-18), 2018-07-27
Supplement: zac008187308s1.pdf [file zac008187308s1.pdf]

## SUPPLEMENTARY MATERIAL

### Rifabutin acts in synergy and is bactericidal with frontline *Mycobacterium abscessus* antibiotics clarithromycin and tigecycline, suggesting a potent treatment combination

Mark Pryjma, Jan Burian, and Charles J. Thompson\*

Department of Microbiology and Immunology and the Centre for Tuberculosis Research, University of British Columbia, Vancouver, Canada, V6T 1Z3

\*To whom correspondence should be addressed:

Tel: 1-604-822-2501

Email: [charles.thompson@ubc.ca](mailto:charles.thompson@ubc.ca)

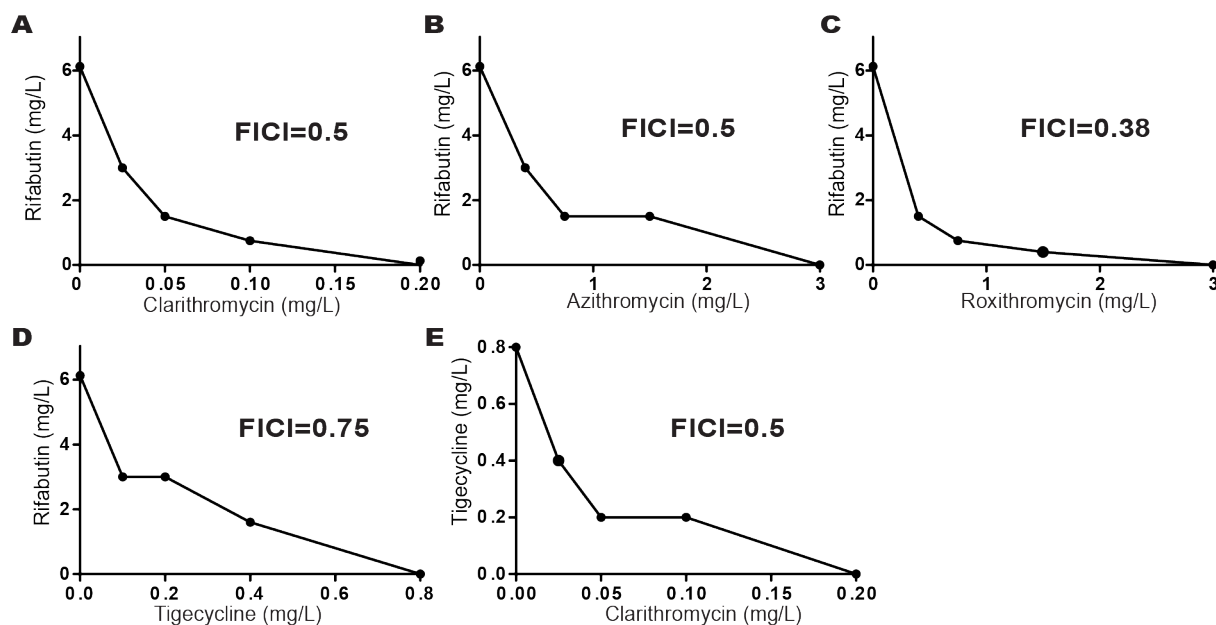

**Figure S1. *Mycobacterium abscessus* checkerboard plots of rifabutin in combination with various antibiotics.** MAB ATCC19977 MICs to rifabutin were measured in the presence of sub-MIC concentrations of **A)** clarithromycin, **B)** azithromycin, **C)** roxithromycin or **D)** tigecycline. Alternatively, **E)** the tigecycline MIC was measured in the presence of sub-MIC concentrations of clarithromycin. Concave curves represent positive interactions between two antibiotics approaching synergy. FICI values for antibiotic combinations are shown. FICI  $\leq$  0.75 represents synergy.

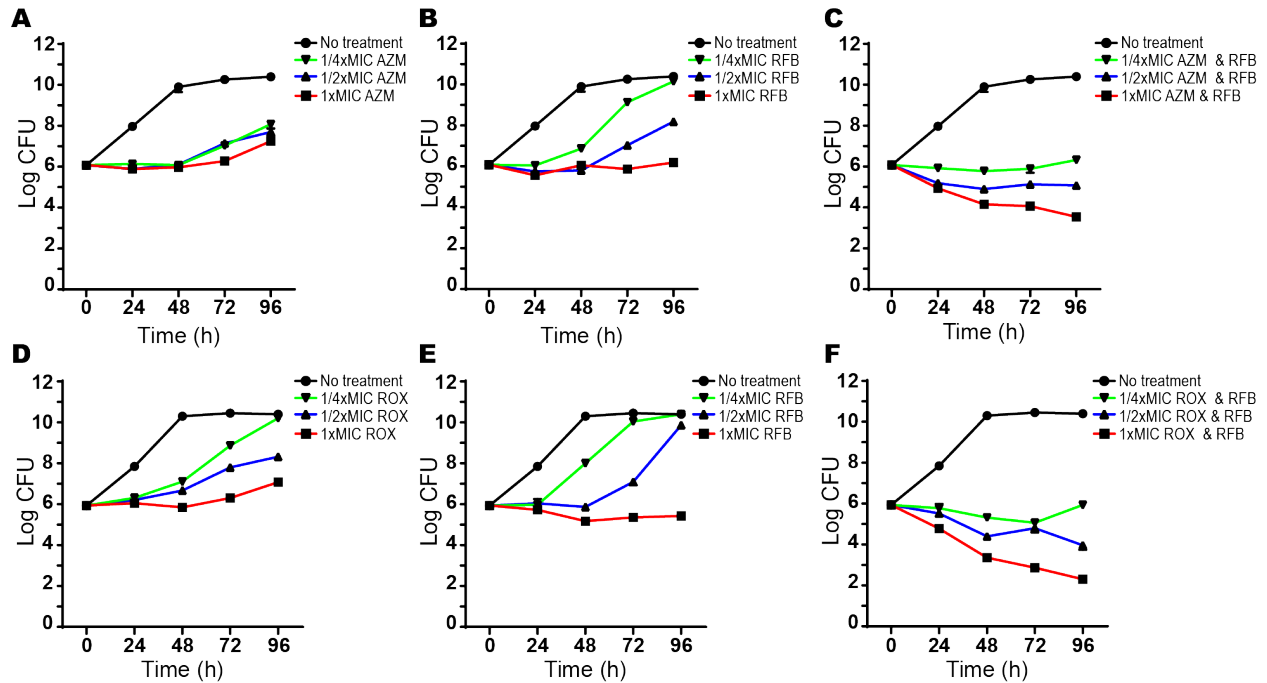

**Figure S2. Effect of rifabutin and azithromycin or roxithromycin combinations on *Mycobacterium abscessus* viability.** *MAB* ATCC19977 cultures at OD600=0.005 were exposed to **A)** azithromycin at 1x (3.1 mg/L), 1/2x or 1/4xMIC, **B&E)** Rifabutin at 1x (6.3 mg/L), 1/2x or 1/4xMIC, **C)** a combination of azithromycin and rifabutin at 1x, 1/2x, and 1/4xMIC of each antibiotic, **D)** roxithromycin at 1x (3.1 mg/L), 1/2x or 1/4xMIC, or **F)** roxithromycin and rifabutin at 1x, 1/2x or 1/4xMIC of each antibiotic. CFUs were determined at 24 h intervals post antibiotic addition. The dashed line represents the limit of detection. Data points are the means of three replicates with standard deviation presented as error bars.

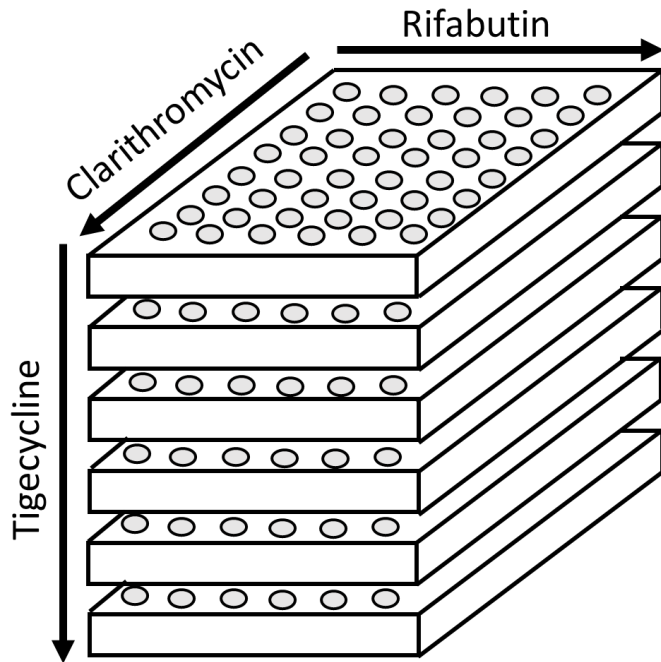

**Figure S3. Schematic representation of 3D checkerboard.** Arrows describe descending concentrations of the respective antibiotic along the axis indicated.

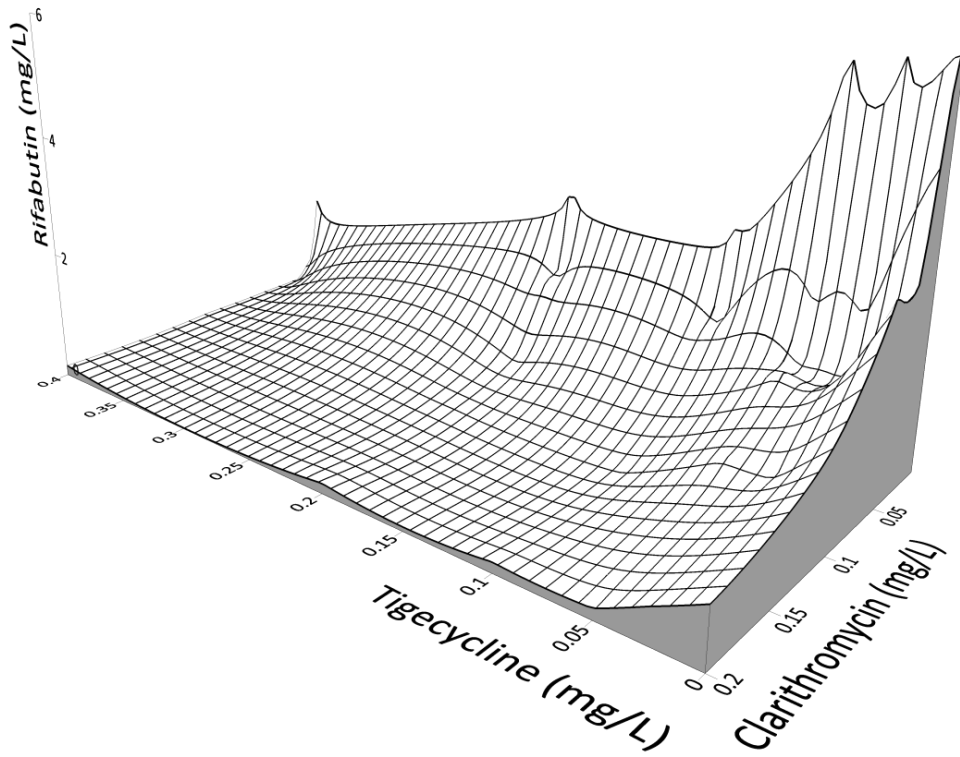

Figure S4. Isobologram showing interaction of clarithromycin, tigecycline and rifabutin against *Mycobacterium abscessus*. Concave areas represent synergistic drug interactions.
